# Supplementary figures and images for: A novel algorithm for detecting differentially regulated paths based on gene set enrichment analysis
Source: PubMed Central journal article supplement — Bioinformatics. 2009 Aug 27;25(21):2787–94. doi: 10.1093/bioinformatics/btp510 (PMC2781748; doi:10.1093/bioinformatics/btp510), 2009-08-27

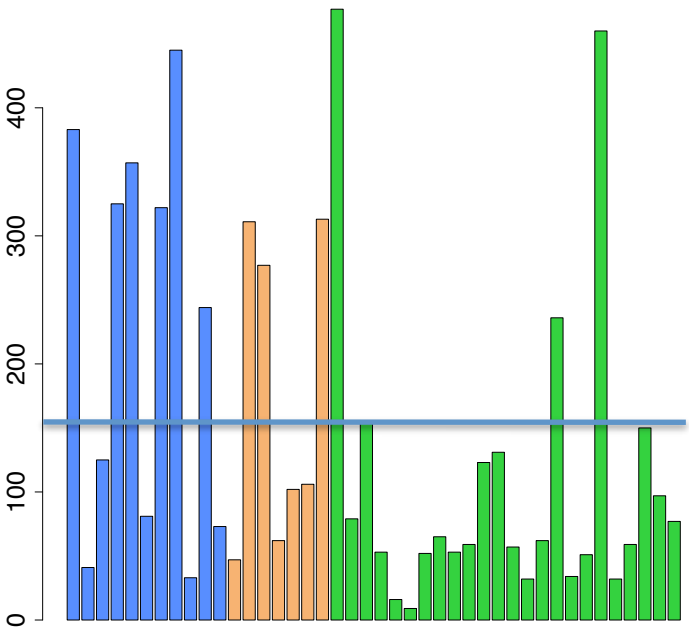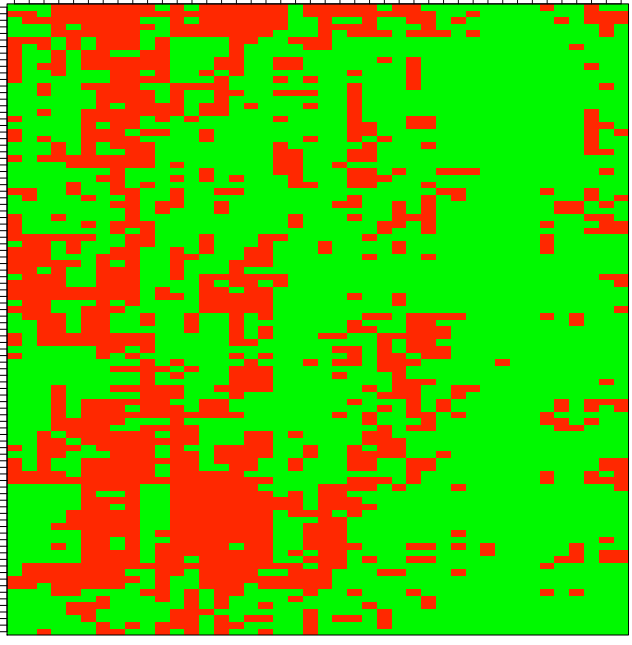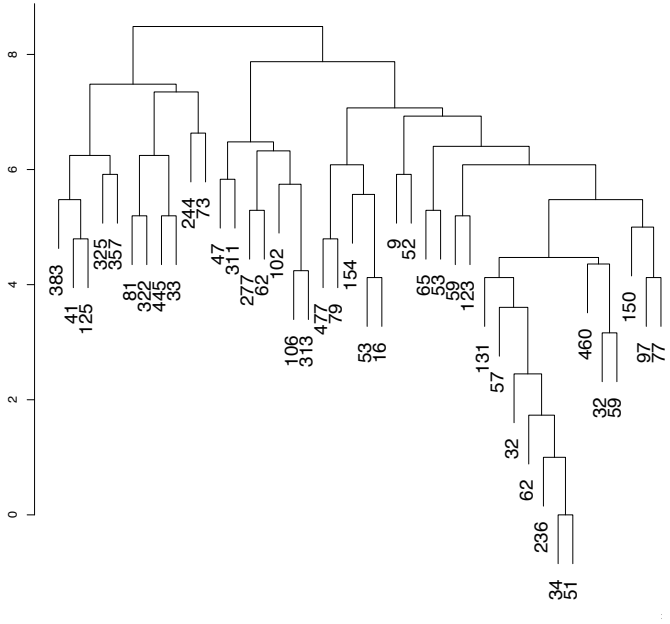

Supplement: btp510_1.pdf [file btp510_1.pdf]

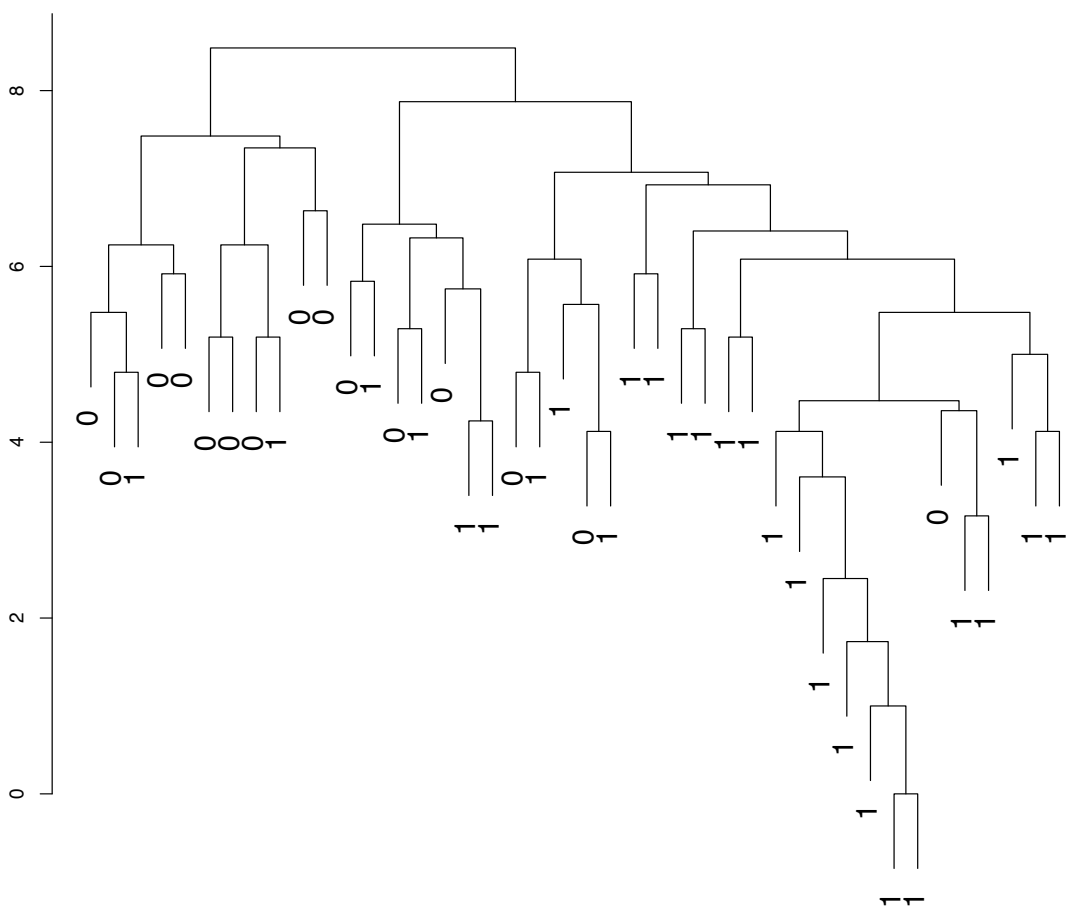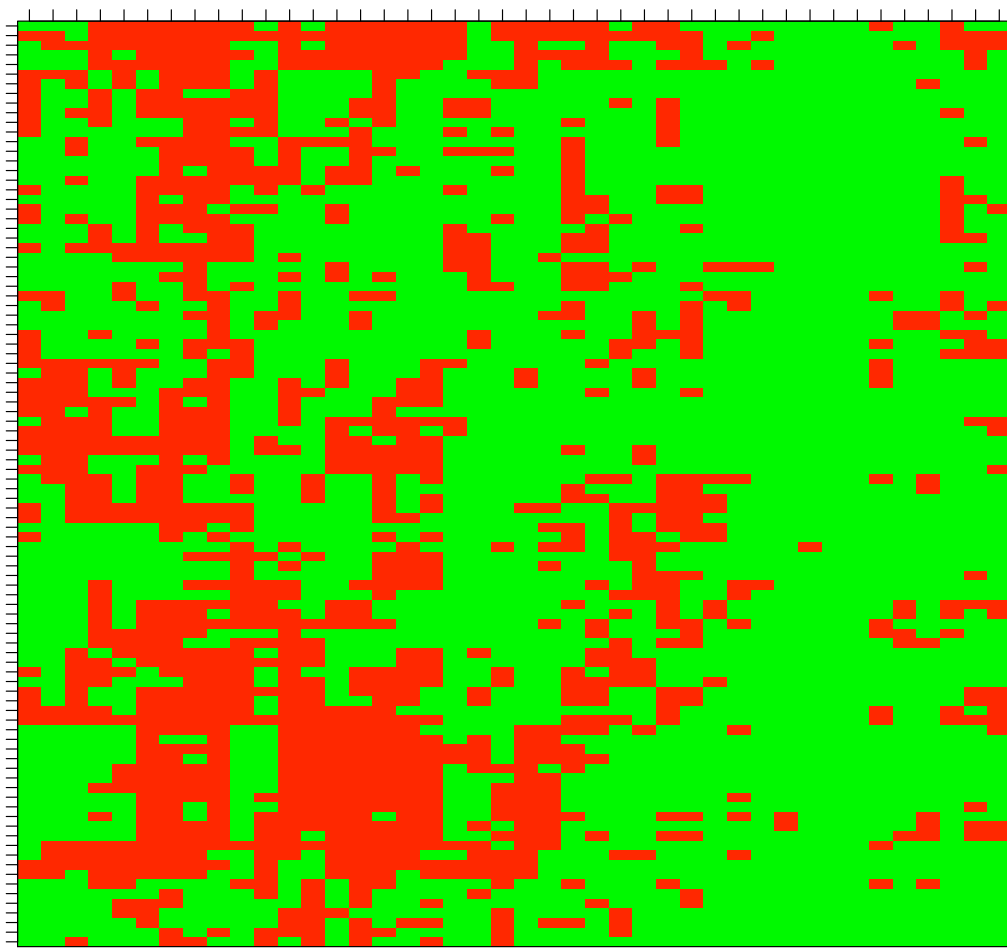

Supplement: btp510_2.pdf [file btp510_2.pdf]
